# Supplementary material
Source: HighWire-hosted journal article supplement (https://bmjopen.bmj.com/content/12/2/e047745)
Supplement: inline-supplementary-material-1 [file inline-supplementary-material-1.pdf]

1    **Supplementary material**

2    **Supplementary tables**

3

| Table S1: Characteristics of GPs participating in the focus group meetings. |               |               |               |            |
|-----------------------------------------------------------------------------|---------------|---------------|---------------|------------|
|                                                                             | Focus group 1 | Focus group 2 | Focus group 3 | Total      |
| Total, n                                                                    | 8             | 5             | 4             | 17         |
|                                                                             |               |               |               |            |
| Intervention group, n(%)                                                    | 4 (50)        | 2 (40)        | 3 (75)        | 9 (53)     |
| Male, n(%)                                                                  | 4 (50)        | 2 (40)        | 1 (25)        | 7 (41)     |
| Age, median (IQR)                                                           | 51 (43-57)    | 49 (41-62)    | 36 (35-52)    | 49 (39-57) |
| Years of professional experience, median (IQR)                              | 17 (12-22)    | 16 (7-30)     | 8 (7-25)      | 14 (8-25)  |
| Professional environment, n(%)                                              |               |               |               |            |
| Individual practice                                                         | 2 (25)        | 1 (20)        | 0 (0)         | 3 (18)     |
| Duo practice                                                                | 2 (25)        | 3 (60)        | 2 (50)        | 7 (41)     |
| Group practice or medical centre                                            | 4 (50)        | 1 (20)        | 2 (50)        | 7 (41)     |
|                                                                             |               |               |               |            |
| Abbreviations: GP, general practitioner; IQR, interquartile range           |               |               |               |            |

4

5

6    **Supplementary figures**

Figure S1: Additional outcomes of the training evaluation survey.

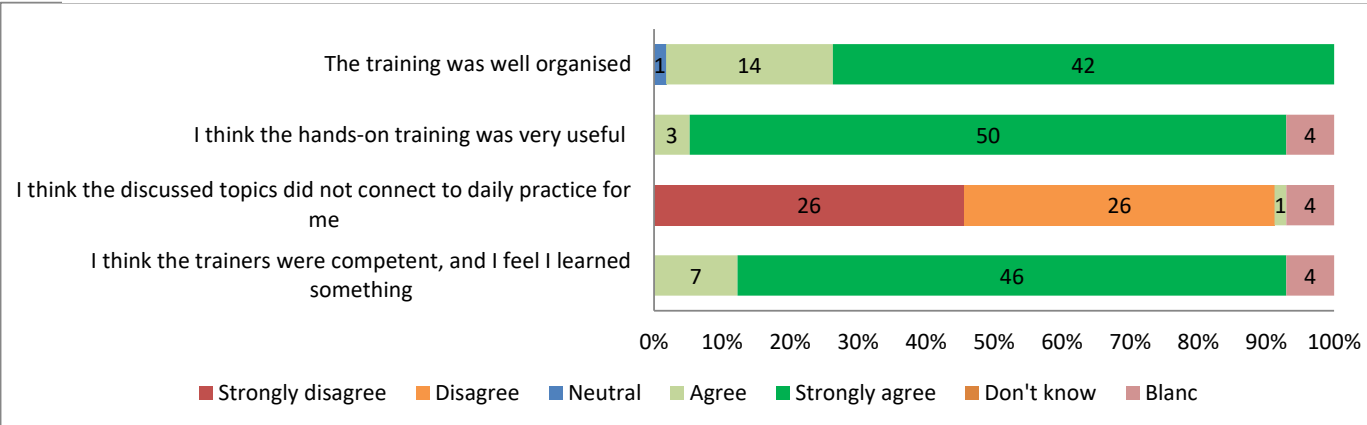

7

8

## 9 Appendices

### 10 Appendix A

11 Training evaluation survey February 2016.

| Statement                                                                    | Strongly disagree | Disagree | Neither agree or disagree | Agree | Strongly agree | Don't know | No opinion | Not filled in |
|------------------------------------------------------------------------------|-------------------|----------|---------------------------|-------|----------------|------------|------------|---------------|
| 1.I would recommend this training for my colleagues.                         |                   |          |                           |       |                |            |            |               |
| 2. The hands-on part using human specimen was useful.                        |                   |          |                           |       |                |            |            |               |
| 3. The subjects of the training did not reflect daily practice.              |                   |          |                           |       |                |            |            |               |
| 4. The teachers were competent, I learned something today.                   |                   |          |                           |       |                |            |            |               |
| 5. The training was well organised.                                          |                   |          |                           |       |                |            |            |               |
| 6. It was clear was it expected from me as a participant in the trial.       |                   |          |                           |       |                |            |            |               |
| 7. After this training, I will manage patients with skin cancer differently. |                   |          |                           |       |                |            |            |               |
| 8. This training was useful for me.                                          |                   |          |                           |       |                |            |            |               |

12

### 13 Appendix B

14 Trial evaluation survey November 2016.

15 Q1: In which study group are you randomized?

16 a. Intervention group

17 b. Care as usual group

18 Q2: How many patients did you include in the trial? ....

19 Q3: Statement; I do see patients with cutaneous lesions suspicious for a malignancy. The reason I do  
20 not include them in the trial are...

21 a. Lack of time

22 b. I don't understand the study forms

23 c. The trial restricts me in skin cancer excisions

24 d. I am afraid to do skin surgery

25 e. The patients declined

26 f. Financial reasons

27 g. I realize I could have included patients afterwards

28 h. I don't want to include patient because then I have to treat them differently

29 i. Other: ....

30 Q4: Numbers show that GPs should see around 5 patient a year who meet the criteria for low-risk  
31 basal cell carcinomas (i.e., <1cm, non-aggressive subtype, primary tumour, low-risk locations).

32 a. I see less than 5 patients

33 b. I see 5 patients, but I don't include them

- 34 c. I see more than 5, but I don't include them  
 35 d. Other: ....
- 36 Q5: Statement; it would be easier for me to only include patients with a skin lesion suspected for  
 37 low-risk basal cell carcinoma, instead of patient with a skin lesion suspected for a malignancy in  
 38 general.
- 39 a. Agree  
 40 b. Disagree  
 41 c. It does not matter
- 42 Q6: How often would you like to be reminded by us for including patients in the trial?
- 43 a. Weekly  
 44 b. 2-weekly  
 45 c. Monthly  
 46 d. Other: ....
- 47 Q7: Do you think it would be easier to include patients if these consultation were clustered?
- 48 a. Yes  
 49 b. No
- 50 Q8: Do you have any ideas how we can make it more easy for you? All ideas are welcome! ...
- 51 Q9: Do you have any final remarks? ...
- 52 **Appendix C**  
 53 Medical record analysis.

| Selected ICPC codes |                                                                                                                                                           |
|---------------------|-----------------------------------------------------------------------------------------------------------------------------------------------------------|
| S04                 | Localised tumour skin/subcutis                                                                                                                            |
| S05                 | Multiple tumours skin/subcutis                                                                                                                            |
| S06                 | Localised redness/erythema of the skin                                                                                                                    |
| S21                 | .01 Dry skin/ squamae<br>.02 Lichenification/induration                                                                                                   |
| S26                 | Fear for cancer of the skin/subcutis                                                                                                                      |
| S77                 | .01 Basal cell carcinoma<br>.02 Squamous cell carcinoma<br>.03 Malignant melanoma<br>.04 Kaposi sarcoma                                                   |
| S79                 | .01 Dermatofibroma                                                                                                                                        |
| S80                 | .01 Dysplastic naevus                                                                                                                                     |
| S82                 | Naevus/mole                                                                                                                                               |
| S99                 | .01 Granuloma pyogenicum<br>.02 Seborrheic keratosis<br>.03 Rosacea<br>.04 Vitiligo<br>.05 Discoid lupus erythematosus<br>.06 Lichen planus<br>.07 Striae |

|  |                                                                                    |
|--|------------------------------------------------------------------------------------|
|  | .08 Erythema nodosum<br>.09 Keloid<br>.10 Keratoacanthoma<br>.11 Actinic keratosis |
|--|------------------------------------------------------------------------------------|

54  
55  
56  
57  
58  
59  
60  
61  
62  
63  
64  
65  
66  
67  
68  
69  
70  
71  
72  
73  
74  
75  
76

Appendix D

Introduction

- Introduction
- Background and aim of study
- Aim and structure of interview
- Informed consent forms, permission audio-taping, demographic questionnaire to be filled in
- 

Part 1: Experiences with the SKINCATCH Trial

- General experiences with the trial

Part 2: Perceived barriers related to the low inclusion rate

- Perceived barriers related to the low inclusion rate of low-risk BCCs in the trial

Part 3: Perceived barriers related to the implementation of the trial (low excision rate)

- Perceived barriers related to the low excision rate

Part 4: Suggestions to facilitate implementation in the future

- Practical solutions to facilitate implementation
